# Supplementary material for: Citizen Science Fiction: The Potential of Situated Speculative Prototyping for Public Engagement on Emerging Technologies
Source: Springer Nature journal article supplement (doi:10.1007/s11569-020-00382-4), 2021-03-13
Supplement: MOESM2 [file 18963050]

## Electronic Supplementary Source 2. Examples of input material story-writing exercise

**Narrative placemat**

1. Randomly pick a place card from the stack

2. Think of a person in that place

3. Choose the effect card(s) you find relevant to explore

Draw your created person in this box

Name:

Age:

Gender:

Job:

Preoccupations/interests:

Fig. 1. Story placemat on which cards can be clustered and story characters can be drawn

|                 |                         |
|-----------------|-------------------------|
| <b>Hospital</b> | <b>School</b>           |
| <b>Holiday</b>  | <b>Public transport</b> |

Fig 2. Examples story ingredient cards: places (19 in total)

|                                                              |                                                 |
|--------------------------------------------------------------|-------------------------------------------------|
| <b>Changes in the roles and responsibilities people have</b> | <b>Effects on environment</b>                   |
| <b>The object is used in a way that was not intended</b>     | <b>The object changes what we see as normal</b> |

Fig 3. Examples story ingredient cards: societal impacts (19 in total)
