# Supplementary material for: Citizen Science Fiction: The Potential of Situated Speculative Prototyping for Public Engagement on Emerging Technologies
Source: Springer Nature journal article supplement (doi:10.1007/s11569-020-00382-4), 2021-03-13
Supplement: MOESM3 [file 18963050]

### Electronic Supplementary Source 3. Example pictures of prototypes created by dialogue participants

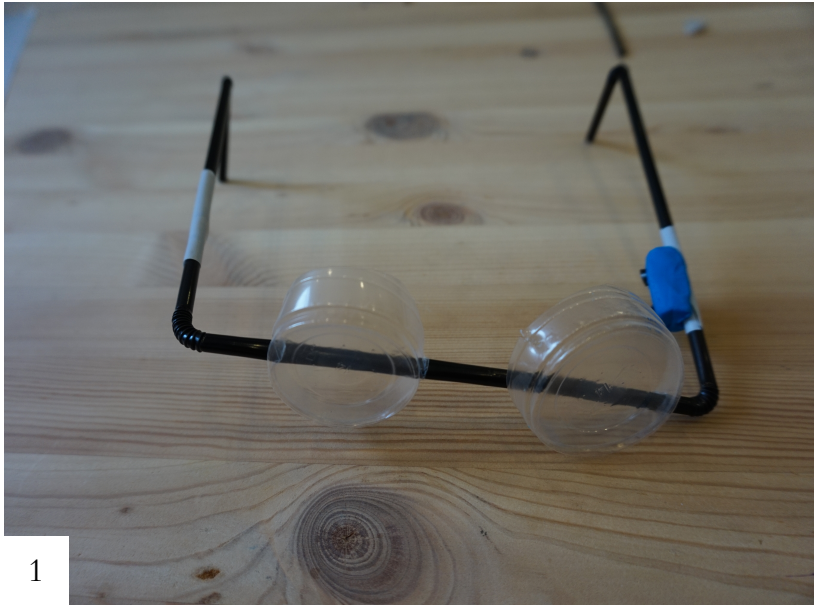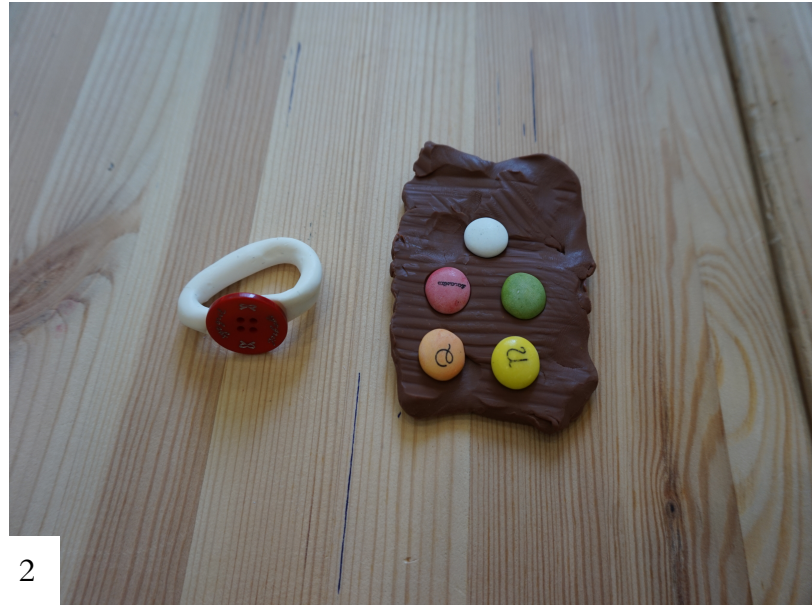

Fig. 1. Smart Safety Glasses

Fig. 2. Telepathic Ring

Fig. 3 Doctor Plupp

Fig. 4. Clean-up textile

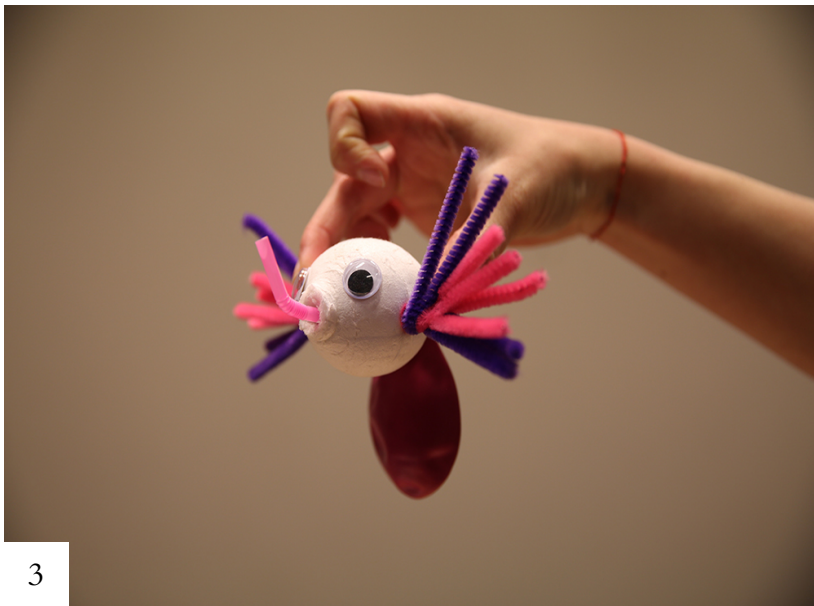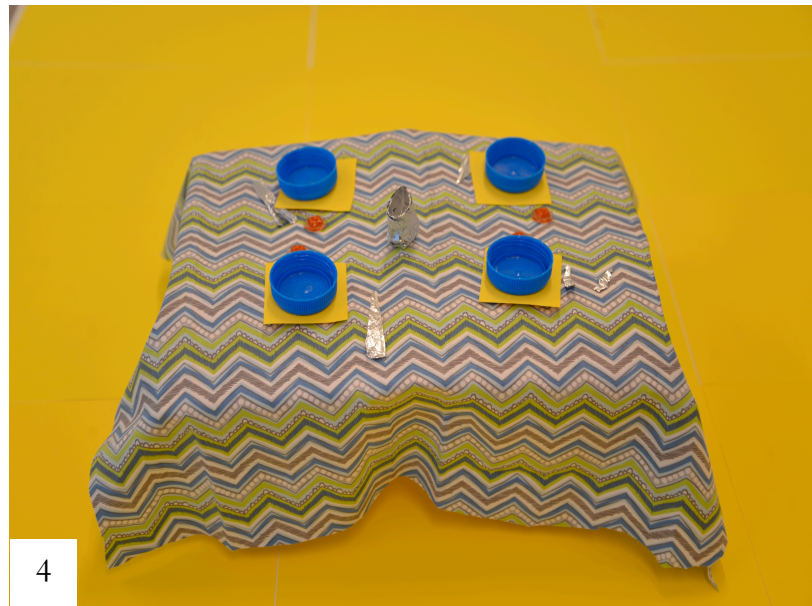

3

4
